# Supplementary material
Source: publisher site journal article supplement (https://www.dovepress.com/get_supplementary_file.php?f=498437.docx)
Supplement: Supplementary file 1 [file get_supplementary_file.php]

**Supplementary material to the article** **Frequency of exacerbations of chronic obstructive pulmonary disease associated with the long-term exposure to air pollution in the AIREPOC cohort**

**Selection**

**Included**

**Eligible**

**Identification**

Identificación entificación

Patients COPD- E
(n = 722)

Patients with COPD -E
(n = 382)

One COPD-E (n = 262)

Two COPD-E (n = 148)

Three COPD-E (n = 90)

More than four COPD-E (n = 80)

Figure S1. Patient selection flowchart from the AIREPOC Program patient cohort, Fundación Neumológica Colombiana, 2018–2021, Bogotá D.C.

**Figure S2 The spatial distribution of PM2.5 ug/m3 and NO2 ug/m3 exposure for each patient in the AIREPOC program from 2018 to 2021**

**PM2.5 ug/m3  NO2 ug/m3**

**
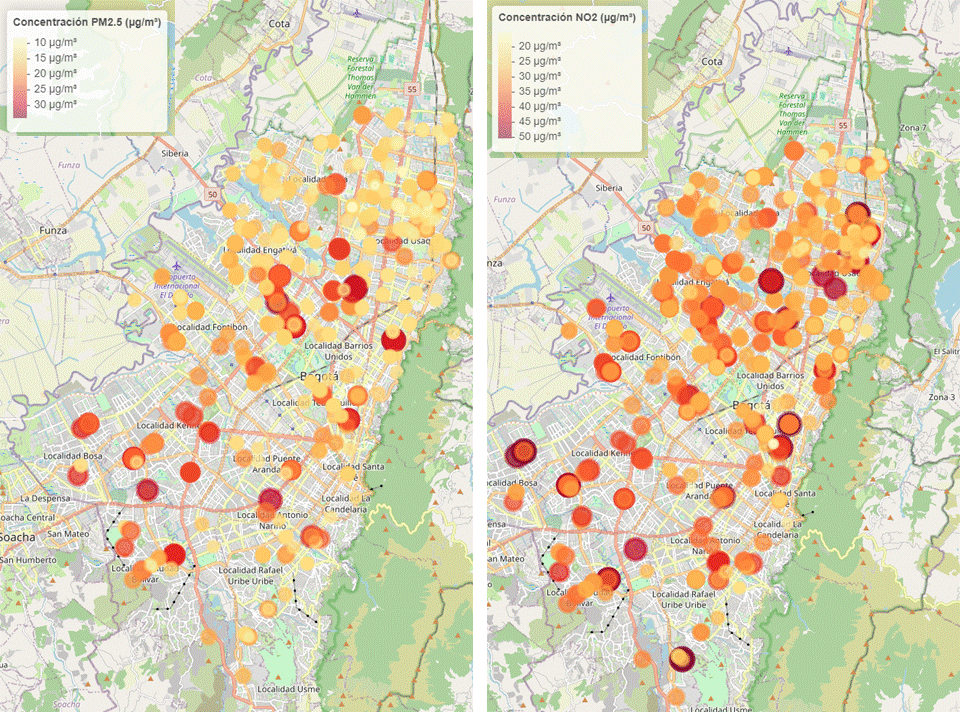
**

**Table S1** Variables associated with the number of COPD exacerbations in the zero-truncated negative binomial regression model by gender

|  | **PM2.5 ≥ 15 µg/m3** | | | | | | |  |  |  | **NO2 ≥ 25 µg/m3** | | |  |  |  |
| --- | --- | --- | --- | --- | --- | --- | --- | --- | --- | --- | --- | --- | --- | --- | --- | --- |
|  | Males | | | Value of P | Women | | | Value of P | Males | | | Value of P | Women | | | Value of P |
| Contaminant | 0.81 | 0.60 | 1.09 | 0.000 | 0.93 | 0.71 | 1.22 | 0.161 | 1.57 | 1.05 | 2.35 | 0.027 | 1.09 | 0.80 | 1.48 | 0.564 |
| Grade B | 0.97 | 0.66 | 1.43 | 0.895 | 0.73 | 0.50 | 1.06 | 0.112 | 0.97 | 0.65 | 1.41 | 0.836 | 0.71 | 0.49 | 1.04 | 0.071 |
| Grade C | 1.79 | 1.17 | 2.74 | 0.004 | 1.45 | 0.90 | 2.33 | 0.201 | 1.88 | 1.23 | 2.88 | 0.003 | 1.21 | 0.81 | 1.77 | 0.179 |
| Grade D | 2.26 | 1.53 | 3.34 | 0.000 | 1.37 | 0.95 | 1.97 | 0.087 | 2.21 | 1.49 | 3.26 | 0.000 | 1.33 | 0.83 | 2.15 | 0.126 |
| Depression | 1.01 | 0.98 | 1.03 | 0.652 | 1.01 | 0.98 | 1.03 | 0.429 | 1.01 | 0.97 | 1.03 | 0.648 | 1.01 | 0.98 | 1.03 | 0.415 |
| FEV1 pre bronchodilator | 1.12 | 0.88 | 1.42 | 0.447 | 0.88 | 0.62 | 1.23 | 0.458 | 1.11 | 0.87 | 1.40 | 0.425 | 0.91 | 0.64 | 1.26 | 0.493 |
| Relative humidity | 0.81 | 0.75 | 0.87 | 0.000 | 0.95 | 0.89 | 1.01 | 0.457 | 0.83 | 0.78 | 0.89 | 0.000 | 0.96 | 0.90 | 1.02 | 0.890 |
| Solar radiation | 1.01 | 1.004 | 1.02 | 0.047 | 1.01 | 1.004 | 1.018* | 0.034 | 1.01 | 1.01 | 1.02 | 0.004 | 1.01 | 1.004 | 1.02 | 0.000 |

**Abbreviations:**

IDR: Incidence density

CI: Confidence intervals

FEV1 pre bronchodilator: Forced Expiratory Volume in the first-second pre bronchodilator.

**Table S2 Goodness-of-fit of zero-truncated negative binomial models**

| Indexes | PM2.5 | | NO2 | |
| --- | --- | --- | --- | --- |
|  | Males | Women | Males | Women |
| Log-Likelihood | -377.638 | -269.9512 | -375.9986 | -269.8811 |
| AIC | 775.276 | 559.9025 | 771.9973 | 559.7622 |
| Collinearity | No | No | No | No |
| RMSE | 18.624 | 462.600 | 18.299 | 466.80 |

**Abbreviations:**

AIC: Akaike information criterion

RMSE: Root mean square Error
